# Supplementary material for: Saving Resources: SARS-CoV-2 Diagnostics by Real-Time RT-PCR Using Reduced Reaction Volumes
Source: MDPI journal article supplement (doi:10.3390/diseases9040084), 2021-11-15
Supplement: s1 [file s1]

**Supplementary Table S2.** Limit of detection LOD95% of the protocols used in this study as determined based on two distinct preparations of culture-grown SARS-CoV-2.

| PCR chemistry/total reaction volume              | LOD95%  | 95% confidence interval |
|--------------------------------------------------|---------|-------------------------|
| <u>virus preparation 1</u>                       |         |                         |
| E-Sarbeco, AgPath-ID One-Step RT-PCR Reagents    | 35.046  | 8.215, 236.619          |
| E-Sarbeco, qScript XLT One-Step RT-qPCR          | 35.046  | 8.215, 236.619          |
| E-Sarbeco, Luna Universal Probe One-Step RT-qPCR | 35.046  | 8.215, 236.619          |
| IP4, AgPath-ID One-Step RT-PCR Reagents          | 35.046  | 8.215, 236.619          |
| IP4, qScript XLT One-Step RT-qPCR                | 35.046  | 8.215, 236.619          |
| IP4, Luna Universal Probe One-Step RT-qPCR       | 6.705   | 0.839, 53.744           |
| CDC-N3, AgPath-ID One-Step RT-PCR Reagents       | 6.705   | 0.839, 53.744           |
| CDC-N3, qScript XLT One-Step RT-qPCR             | 35.046  | 8.215, 236.619          |
| CDC-N3, Luna Universal Probe One-Step RT-qPCR    | 102.628 | 21.628, 492.456         |
| <u>virus preparation 2</u>                       |         |                         |
| singleplex E-Sarbeco                             | 3.929   | 0.921, 26.529           |
| multiplex E-Sarbeco + beta-actin                 | 11.506  | 2.425, 55.212           |
| multiplex E-Sarbeco + IC2/EGFP                   | 1.151   | 0.242, 5.458            |
| singleplex IP4                                   | 11.506  | 2.425, 55.212           |
| multiplex IP4 + beta-actin                       | 3.929   | 0.921, 26.529           |
| multiplex IP4 + IC2/EGFP                         | 11.506  | 2.425, 55.212           |
| singleplex CDC-N3                                | 11.506  | 2.425, 55.212           |
| multiplex CDC-N3 + beta-actin                    | 3.929   | 0.921, 26.529           |
| multiplex CDC-N3 + IC2/EGFP                      | 3.929   | 0.921, 26.529           |
