# Supplementary material for: Saving Resources: SARS-CoV-2 Diagnostics by Real-Time RT-PCR Using Reduced Reaction Volumes
Source: MDPI journal article supplement (doi:10.3390/diseases9040084), 2021-11-15
Supplement: s1 [file s1]

**Supplementary Table S1.** Limit of detection LOD95% of the protocols used in this study as determined based on a PCR standard provided by Charité – Universitätsmedizin Berlin, Germany, via European Virus Archive goes global (EVAg), Ref-SKU: 026N-03889. Org. – original protocol

| PCR chemistry/total reaction volume                        | LOD95% | 95% confidence interval |
|------------------------------------------------------------|--------|-------------------------|
| SuperScript III One Step RT-PCR/org. (25 µl, as published) | 5.637  | 2.669, 11.970           |
| AgPath-ID One-Step RT-PCR Reagents/org. (25 µl)            | 9.219  | 4.392, 19.422           |
| AgPath-ID One-Step RT-PCR Reagents, 15 µl                  | 3.322  | 1.600, 6.884            |
| AgPath-ID One-Step RT-PCR Reagents, 12.5 µl                | 3.440  | 1.657, 7.126            |
| qScript XLT One-Step RT-qPCR ToughMix/org. (25 µl)         | 4.030  | 1.929, 8.412            |
| qScript XLT One-Step RT-qPCR ToughMix, 15 µl               | 2.101  | 1.000, 4.453            |
| qScript XLT One-Step RT-qPCR ToughMix, 12.5 µl             | 4.599  | 2.184, 9.660            |
